# Supplementary material for: Organization and Evolution of Primate Centromeric DNA from Whole-Genome Shotgun Sequence Data
Source: PLoS Comput Biol. 2007 Sep 28;3(9):e181. doi: 10.1371/journal.pcbi.0030181 (PMC1994983; doi:10.1371/journal.pcbi.0030181)
Supplement: Table S1 — (59 KB XLS) [file pcbi.0030181.st001.xls]

## Sheet: Sheet1
Table S1 :Representation of known Human HOR satellites within WIBR2, Celera, BCM-HWW, S213
Library	HOR name	Accession	#WGS reads		Library	HOR name	Accession	#WGS reads		Library	HOR name	Accession	#WGS reads		Library	HOR name	Accession	#WGS reads
WIBR2	D10Z1	M93286	1		Celera	D10Z1	M93286	216		BCM-HWW	D10Z1	M93286	26		S213	D10Z1	M93286	101
WIBR2	D10Z1	M93286	204		Celera	D10Z1	M93286	1036		BCM-HWW	D10Z1	M93286	190		S213	D10Z1	M93286	524
WIBR2	D10Z1	M93286	226		Celera	D10Z1	M93286	1001		BCM-HWW	D10Z1	M93286	166		S213	D10Z1	M93286	494
WIBR2	D10Z1	M93286	259		Celera	D10Z1	M93286	1099		BCM-HWW	D10Z1	M93286	203		S213	D10Z1	M93286	603
WIBR2	D10Z1	M93286	86		Celera	D10Z1	M93286	357		BCM-HWW	D10Z1	M93286	68		S213	D10Z1	M93286	220
WIBR2	D10Z1	M93286	0		Celera	D10Z1	M93286	0		BCM-HWW	D10Z1	M93286	0		S213	D10Z1	M93286	1
WIBR2	D10Z1b	M93288	182		Celera	D10Z1b	M93288	907		BCM-HWW	D10Z1b	M93288	183		S213	D10Z1b	M93288	508
WIBR2	D10Z1b	M93288	204		Celera	D10Z1b	M93288	1035		BCM-HWW	D10Z1b	M93288	190		S213	D10Z1b	M93288	521
WIBR2	D10Z1b	M93288	242		Celera	D10Z1b	M93288	1070		BCM-HWW	D10Z1b	M93288	176		S213	D10Z1b	M93288	514
WIBR2	D10Z1b	M93288	323		Celera	D10Z1b	M93288	1292		BCM-HWW	D10Z1b	M93288	242		S213	D10Z1b	M93288	703
WIBR2	D10Z1b	M93288	0		Celera	D10Z1b	M93288	0		BCM-HWW	D10Z1b	M93288	0		S213	D10Z1b	M93288	0
WIBR2	D11Z1	M21452	5		Celera	D11Z1	M21452	3		BCM-HWW	D11Z1	M21452	1		S213	D11Z1	M21452	2
WIBR2	D11Z1	M21452	1		Celera	D11Z1	M21452	1		BCM-HWW	D11Z1	M21452	0		S213	D11Z1	M21452	1
WIBR2	D11Z1	M21452	521		Celera	D11Z1	M21452	1987		BCM-HWW	D11Z1	M21452	475		S213	D11Z1	M21452	1128
WIBR2	D12Z3	M93287	521		Celera	D12Z3	M93287	1167		BCM-HWW	D12Z3	M93287	251		S213	D12Z3	M93287	728
WIBR2	D12Z3	M93287	540		Celera	D12Z3	M93287	1371		BCM-HWW	D12Z3	M93287	289		S213	D12Z3	M93287	767
WIBR2	D12Z3	M93287	575		Celera	D12Z3	M93287	1468		BCM-HWW	D12Z3	M93287	296		S213	D12Z3	M93287	783
WIBR2	D12Z3	M93287	508		Celera	D12Z3	M93287	1231		BCM-HWW	D12Z3	M93287	239		S213	D12Z3	M93287	700
WIBR2	D12Z3	M93287	0		Celera	D12Z3	M93287	0		BCM-HWW	D12Z3	M93287	0		S213	D12Z3	M93287	0
WIBR2	D12Z3	M93287	0		Celera	D12Z3	M93287	5		BCM-HWW	D12Z3	M93287	0		S213	D12Z3	M93287	0
WIBR2	D12Z3	M93287	491		Celera	D12Z3	M93287	1093		BCM-HWW	D12Z3	M93287	202		S213	D12Z3	M93287	578
WIBR2	D15Z3	AF237720	223		Celera	D15Z3	AF237720	457		BCM-HWW	D15Z3	AF237720	121		S213	D15Z3	AF237720	232
WIBR2	D15Z3	AF237720	1		Celera	D15Z3	AF237720	13		BCM-HWW	D15Z3	AF237720	2		S213	D15Z3	AF237720	11
WIBR2	D15Z3	AF237720	1		Celera	D15Z3	AF237720	5		BCM-HWW	D15Z3	AF237720	0		S213	D15Z3	AF237720	6
WIBR2	D15Z3	AF237720	0		Celera	D15Z3	AF237720	0		BCM-HWW	D15Z3	AF237720	0		S213	D15Z3	AF237720	0
WIBR2	D15Z3	AF237720	0		Celera	D15Z3	AF237720	0		BCM-HWW	D15Z3	AF237720	0		S213	D15Z3	AF237720	0
WIBR2	D15Z3	AF237720	0		Celera	D15Z3	AF237720	4		BCM-HWW	D15Z3	AF237720	0		S213	D15Z3	AF237720	3
WIBR2	D15Z3	AF237720	6		Celera	D15Z3	AF237720	17		BCM-HWW	D15Z3	AF237720	2		S213	D15Z3	AF237720	11
WIBR2	D15Z3	AF237720	4		Celera	D15Z3	AF237720	3		BCM-HWW	D15Z3	AF237720	1		S213	D15Z3	AF237720	4
WIBR2	D16Z2	M58446	446		Celera	D16Z2	M58446	1910		BCM-HWW	D16Z2	M58446	484		S213	D16Z2	M58446	1366
WIBR2	D16Z2	M58446	179		Celera	D16Z2	M58446	867		BCM-HWW	D16Z2	M58446	256		S213	D16Z2	M58446	592
WIBR2	D16Z2	M58446	153		Celera	D16Z2	M58446	791		BCM-HWW	D16Z2	M58446	194		S213	D16Z2	M58446	523
WIBR2	D17Z1	M13882	259		Celera	D17Z1	M13882	880		BCM-HWW	D17Z1	M13882	309		S213	D17Z1	M13882	585
WIBR2	D17Z1	M13882	334		Celera	D17Z1	M13882	1011		BCM-HWW	D17Z1	M13882	390		S213	D17Z1	M13882	656
WIBR2	D17Z1	M13882	329		Celera	D17Z1	M13882	998		BCM-HWW	D17Z1	M13882	400		S213	D17Z1	M13882	633
WIBR2	D17Z1	M13882	229		Celera	D17Z1	M13882	787		BCM-HWW	D17Z1	M13882	320		S213	D17Z1	M13882	512
WIBR2	D17Z1	M13882	323		Celera	D17Z1	M13882	986		BCM-HWW	D17Z1	M13882	458		S213	D17Z1	M13882	641
WIBR2	D17Z1	M13882	307		Celera	D17Z1	M13882	998		BCM-HWW	D17Z1	M13882	449		S213	D17Z1	M13882	639
WIBR2	D17Z1	M13882	313		Celera	D17Z1	M13882	936		BCM-HWW	D17Z1	M13882	434		S213	D17Z1	M13882	641
WIBR2	D17Z1	M13882	19		Celera	D17Z1	M13882	428		BCM-HWW	D17Z1	M13882	130		S213	D17Z1	M13882	210
WIBR2	D17Z1	M13882	114		Celera	D17Z1	M13882	593		BCM-HWW	D17Z1	M13882	188		S213	D17Z1	M13882	345
WIBR2	D17Z1	M13882	125		Celera	D17Z1	M13882	651		BCM-HWW	D17Z1	M13882	214		S213	D17Z1	M13882	392
WIBR2	D17Z1	M13882	136		Celera	D17Z1	M13882	660		BCM-HWW	D17Z1	M13882	248		S213	D17Z1	M13882	413
WIBR2	D17Z1	M13882	27		Celera	D17Z1	M13882	459		BCM-HWW	D17Z1	M13882	124		S213	D17Z1	M13882	233
WIBR2	D17Z1	M13882	16		Celera	D17Z1	M13882	397		BCM-HWW	D17Z1	M13882	88		S213	D17Z1	M13882	171
WIBR2	D17Z1	M13882	348		Celera	D17Z1	M13882	894		BCM-HWW	D17Z1	M13882	383		S213	D17Z1	M13882	582
WIBR2	D17Z1	M13882	7		Celera	D17Z1	M13882	327		BCM-HWW	D17Z1	M13882	94		S213	D17Z1	M13882	141
WIBR2	D18Z1	M65181	238		Celera	D18Z1	M65181	588		BCM-HWW	D18Z1	M65181	149		S213	D18Z1	M65181	404
WIBR2	D18Z1	M65181	367		Celera	D18Z1	M65181	1665		BCM-HWW	D18Z1	M65181	407		S213	D18Z1	M65181	1023
WIBR2	D18Z1	M65181	332		Celera	D18Z1	M65181	1331		BCM-HWW	D18Z1	M65181	322		S213	D18Z1	M65181	820
WIBR2	D18Z1	M65181	283		Celera	D18Z1	M65181	951		BCM-HWW	D18Z1	M65181	250		S213	D18Z1	M65181	605
WIBR2	D18Z1	M65181	326		Celera	D18Z1	M65181	1681		BCM-HWW	D18Z1	M65181	431		S213	D18Z1	M65181	1145
WIBR2	D18Z1	M65181	393		Celera	D18Z1	M65181	1968		BCM-HWW	D18Z1	M65181	521		S213	D18Z1	M65181	1238
WIBR2	D18Z1	M65181	209		Celera	D18Z1	M65181	745		BCM-HWW	D18Z1	M65181	205		S213	D18Z1	M65181	577
WIBR2	D18Z2	M38466	63		Celera	D18Z2	M38466	153		BCM-HWW	D18Z2	M38466	100		S213	D18Z2	M38466	90
WIBR2	D19Z3	M26919	154		Celera	D19Z3	M26919	556		BCM-HWW	D19Z3	M26919	143		S213	D19Z3	M26919	368
WIBR2	D19Z3	M26920	0		Celera	D19Z3	M26920	0		BCM-HWW	D19Z3	M26920	0		S213	D19Z3	M26920	0
WIBR2	D19Z3	M26920	533		Celera	D19Z3	M26920	1690		BCM-HWW	D19Z3	M26920	336		S213	D19Z3	M26920	892
WIBR2	D19Z3	M26920	0		Celera	D19Z3	M26920	6		BCM-HWW	D19Z3	M26920	0		S213	D19Z3	M26920	8
WIBR2	D19Z3	M26920	349		Celera	D19Z3	M26920	834		BCM-HWW	D19Z3	M26920	148		S213	D19Z3	M26920	467
WIBR2	D1Z5	M38468	0		Celera	D1Z5	M38468	0		BCM-HWW	D1Z5	M38468	0		S213	D1Z5	M38468	2
WIBR2	D1Z5	M38468	0		Celera	D1Z5	M38468	1		BCM-HWW	D1Z5	M38468	0		S213	D1Z5	M38468	2
WIBR2	D1Z7	AJ290544	536		Celera	D1Z7	AJ290544	952		BCM-HWW	D1Z7	AJ290544	317		S213	D1Z7	AJ290544	826
WIBR2	D1Z7	AJ290544	626		Celera	D1Z7	AJ290544	2173		BCM-HWW	D1Z7	AJ290544	492		S213	D1Z7	AJ290544	1161
WIBR2	D1Z7	AJ290544	1454		Celera	D1Z7	AJ290544	5500		BCM-HWW	D1Z7	AJ290544	1036		S213	D1Z7	AJ290544	3072
WIBR2	D20Z2	X56450	269		Celera	D20Z2	X56450	649		BCM-HWW	D20Z2	X56450	105		S213	D20Z2	X56450	45
WIBR2	D20Z2	X58269	390		Celera	D20Z2	X58269	1152		BCM-HWW	D20Z2	X58269	151		S213	D20Z2	X58269	255
WIBR2	D20Z2	X58269	0		Celera	D20Z2	X58269	0		BCM-HWW	D20Z2	X58269	0		S213	D20Z2	X58269	0
WIBR2	D21Z1	D29750	375		Celera	D21Z1	D29750	1062		BCM-HWW	D21Z1	D29750	330		S213	D21Z1	D29750	815
WIBR2	D21Z1	D29750	304		Celera	D21Z1	D29750	992		BCM-HWW	D21Z1	D29750	311		S213	D21Z1	D29750	759
WIBR2	D21Z1	D29750	299		Celera	D21Z1	D29750	1016		BCM-HWW	D21Z1	D29750	314		S213	D21Z1	D29750	709
WIBR2	D21Z1	D29750	361		Celera	D21Z1	D29750	1084		BCM-HWW	D21Z1	D29750	320		S213	D21Z1	D29750	735
WIBR2	D21Z1	D29750	399		Celera	D21Z1	D29750	1078		BCM-HWW	D21Z1	D29750	325		S213	D21Z1	D29750	796
WIBR2	D21Z1	D29750	392		Celera	D21Z1	D29750	1025		BCM-HWW	D21Z1	D29750	307		S213	D21Z1	D29750	725
WIBR2	D21Z1	D29750	385		Celera	D21Z1	D29750	1045		BCM-HWW	D21Z1	D29750	299		S213	D21Z1	D29750	802
WIBR2	D21Z1	D29750	311		Celera	D21Z1	D29750	969		BCM-HWW	D21Z1	D29750	264		S213	D21Z1	D29750	663
WIBR2	D21Z1	D29750	393		Celera	D21Z1	D29750	1249		BCM-HWW	D21Z1	D29750	304		S213	D21Z1	D29750	750
WIBR2	D21Z1	D29750	363		Celera	D21Z1	D29750	1098		BCM-HWW	D21Z1	D29750	288		S213	D21Z1	D29750	756
WIBR2	D2Z1	M81229	549		Celera	D2Z1	M81229	2956		BCM-HWW	D2Z1	M81229	248		S213	D2Z1	M81229	861
WIBR2	D2Z1	M81229	39		Celera	D2Z1	M81229	211		BCM-HWW	D2Z1	M81229	13		S213	D2Z1	M81229	65
WIBR2	D2Z1	M81229	567		Celera	D2Z1	M81229	3110		BCM-HWW	D2Z1	M81229	277		S213	D2Z1	M81229	895
WIBR2	D2Z1	M81229	85		Celera	D2Z1	M81229	398		BCM-HWW	D2Z1	M81229	32		S213	D2Z1	M81229	114
WIBR2	D2Z1	M81229	547		Celera	D2Z1	M81229	2884		BCM-HWW	D2Z1	M81229	214		S213	D2Z1	M81229	819
WIBR2	D2Z1	M81229	158		Celera	D2Z1	M81229	790		BCM-HWW	D2Z1	M81229	66		S213	D2Z1	M81229	244
WIBR2	D2Z1	M81229	385		Celera	D2Z1	M81229	2171		BCM-HWW	D2Z1	M81229	186		S213	D2Z1	M81229	633
WIBR2	D3Z1	Z12006	166		Celera	D3Z1	Z12006	520		BCM-HWW	D3Z1	Z12006	157		S213	D3Z1	Z12006	383
WIBR2	D3Z1	Z12006	142		Celera	D3Z1	Z12006	411		BCM-HWW	D3Z1	Z12006	142		S213	D3Z1	Z12006	344
WIBR2	D3Z1	Z12006	144		Celera	D3Z1	Z12006	392		BCM-HWW	D3Z1	Z12006	126		S213	D3Z1	Z12006	347
WIBR2	D3Z1	Z12006	124		Celera	D3Z1	Z12006	439		BCM-HWW	D3Z1	Z12006	130		S213	D3Z1	Z12006	331
WIBR2	D3Z1	Z12006	103		Celera	D3Z1	Z12006	403		BCM-HWW	D3Z1	Z12006	109		S213	D3Z1	Z12006	283
WIBR2	D3Z1	Z12006	95		Celera	D3Z1	Z12006	299		BCM-HWW	D3Z1	Z12006	92		S213	D3Z1	Z12006	255
WIBR2	D3Z1	Z12006	134		Celera	D3Z1	Z12006	315		BCM-HWW	D3Z1	Z12006	131		S213	D3Z1	Z12006	341
WIBR2	D3Z1	Z12006	154		Celera	D3Z1	Z12006	363		BCM-HWW	D3Z1	Z12006	139		S213	D3Z1	Z12006	356
WIBR2	D3Z1	Z12006	161		Celera	D3Z1	Z12006	378		BCM-HWW	D3Z1	Z12006	165		S213	D3Z1	Z12006	372
WIBR2	D3Z1	Z12006	132		Celera	D3Z1	Z12006	269		BCM-HWW	D3Z1	Z12006	152		S213	D3Z1	Z12006	320
WIBR2	D3Z1	Z12006	152		Celera	D3Z1	Z12006	283		BCM-HWW	D3Z1	Z12006	156		S213	D3Z1	Z12006	303
WIBR2	D3Z1	Z12006	163		Celera	D3Z1	Z12006	377		BCM-HWW	D3Z1	Z12006	141		S213	D3Z1	Z12006	289
WIBR2	D3Z1	Z12006	141		Celera	D3Z1	Z12006	478		BCM-HWW	D3Z1	Z12006	121		S213	D3Z1	Z12006	271
WIBR2	D3Z1	Z12006	184		Celera	D3Z1	Z12006	534		BCM-HWW	D3Z1	Z12006	142		S213	D3Z1	Z12006	371
WIBR2	D3Z1	Z12006	171		Celera	D3Z1	Z12006	508		BCM-HWW	D3Z1	Z12006	150		S213	D3Z1	Z12006	367
WIBR2	D4Z1	Z12011	192		Celera	D4Z1	Z12011	872		BCM-HWW	D4Z1	Z12011	165		S213	D4Z1	Z12011	482
WIBR2	D4Z1	Z12011	133		Celera	D4Z1	Z12011	686		BCM-HWW	D4Z1	Z12011	111		S213	D4Z1	Z12011	307
WIBR2	D4Z1	Z12011	136		Celera	D4Z1	Z12011	678		BCM-HWW	D4Z1	Z12011	109		S213	D4Z1	Z12011	275
WIBR2	D4Z1	Z12011	108		Celera	D4Z1	Z12011	586		BCM-HWW	D4Z1	Z12011	82		S213	D4Z1	Z12011	247
WIBR2	D4Z1	Z12011	162		Celera	D4Z1	Z12011	674		BCM-HWW	D4Z1	Z12011	99		S213	D4Z1	Z12011	299
WIBR2	D4Z1	Z12011	161		Celera	D4Z1	Z12011	693		BCM-HWW	D4Z1	Z12011	95		S213	D4Z1	Z12011	313
WIBR2	D4Z1	Z12012	128		Celera	D4Z1	Z12012	650		BCM-HWW	D4Z1	Z12012	119		S213	D4Z1	Z12012	326
WIBR2	D4Z1	Z12012	134		Celera	D4Z1	Z12012	647		BCM-HWW	D4Z1	Z12012	103		S213	D4Z1	Z12012	349
WIBR2	D4Z1	Z12012	123		Celera	D4Z1	Z12012	536		BCM-HWW	D4Z1	Z12012	86		S213	D4Z1	Z12012	311
WIBR2	D5Z1D19Z2	AJ295405	63		Celera	D5Z1D19Z2	AJ295405	228		BCM-HWW	D5Z1D19Z2	AJ295405	60		S213	D5Z1D19Z2	AJ295405	71
WIBR2	D5Z1D19Z2	AJ295405	48		Celera	D5Z1D19Z2	AJ295405	163		BCM-HWW	D5Z1D19Z2	AJ295405	46		S213	D5Z1D19Z2	AJ295405	57
WIBR2	D5Z1D19Z2	AJ295405	46		Celera	D5Z1D19Z2	AJ295405	126		BCM-HWW	D5Z1D19Z2	AJ295405	35		S213	D5Z1D19Z2	AJ295405	37
WIBR2	D5Z1D19Z2	AJ295405	54		Celera	D5Z1D19Z2	AJ295405	234		BCM-HWW	D5Z1D19Z2	AJ295405	44		S213	D5Z1D19Z2	AJ295405	64
WIBR2	D5Z1D19Z2	AJ295405	47		Celera	D5Z1D19Z2	AJ295405	164		BCM-HWW	D5Z1D19Z2	AJ295405	33		S213	D5Z1D19Z2	AJ295405	58
WIBR2	D5Z1D19Z2	AJ295405	46		Celera	D5Z1D19Z2	AJ295405	171		BCM-HWW	D5Z1D19Z2	AJ295405	36		S213	D5Z1D19Z2	AJ295405	46
WIBR2	D5Z1D19Z2	AJ295405	79		Celera	D5Z1D19Z2	AJ295405	244		BCM-HWW	D5Z1D19Z2	AJ295405	54		S213	D5Z1D19Z2	AJ295405	132
WIBR2	D6Z1	AB005791	188		Celera	D6Z1	AB0057	426		BCM-HWW	D6Z1	AB0057	168		S213	D6Z1	AB0057	263
WIBR2	D6Z1	AB005791	158		Celera	D6Z1	AB0057	329		BCM-HWW	D6Z1	AB0057	212		S213	D6Z1	AB0057	301
WIBR2	D6Z1	AB005791	338		Celera	D6Z1	AB0057	298		BCM-HWW	D6Z1	AB0057	273		S213	D6Z1	AB0057	369
WIBR2	D6Z1	AB005791	339		Celera	D6Z1	AB0057	77		BCM-HWW	D6Z1	AB0057	261		S213	D6Z1	AB0057	316
WIBR2	D6Z1	AB005791	311		Celera	D6Z1	AB0057	13		BCM-HWW	D6Z1	AB0057	244		S213	D6Z1	AB0057	253
WIBR2	D6Z1	AB005791	247		Celera	D6Z1	AB0057	9		BCM-HWW	D6Z1	AB0057	166		S213	D6Z1	AB0057	128
WIBR2	D6Z1	AB005791	7		Celera	D6Z1	AB0057	0		BCM-HWW	D6Z1	AB0057	5		S213	D6Z1	AB0057	0
WIBR2	D6Z1	AB005791	362		Celera	D6Z1	AB0057	99		BCM-HWW	D6Z1	AB0057	294		S213	D6Z1	AB0057	220
WIBR2	D6Z1	AB005791	18		Celera	D6Z1	AB0057	18		BCM-HWW	D6Z1	AB0057	17		S213	D6Z1	AB0057	20
WIBR2	D6Z1	AB005791	192		Celera	D6Z1	AB0057	347		BCM-HWW	D6Z1	AB0057	124		S213	D6Z1	AB0057	213
WIBR2	D6Z1	AB005791	351		Celera	D6Z1	AB0057	708		BCM-HWW	D6Z1	AB0057	281		S213	D6Z1	AB0057	445
WIBR2	D6Z1	AB005791	212		Celera	D6Z1	AB0057	399		BCM-HWW	D6Z1	AB0057	193		S213	D6Z1	AB0057	319
WIBR2	D6Z1	AB005791	366		Celera	D6Z1	AB0057	553		BCM-HWW	D6Z1	AB0057	286		S213	D6Z1	AB0057	447
WIBR2	D6Z1	AB005791	275		Celera	D6Z1	AB0057	506		BCM-HWW	D6Z1	AB0057	230		S213	D6Z1	AB0057	357
WIBR2	D6Z1	AB005791	0		Celera	D6Z1	AB0057	4		BCM-HWW	D6Z1	AB0057	1		S213	D6Z1	AB0057	0
WIBR2	D6Z1	AB005791	265		Celera	D6Z1	AB0057	528		BCM-HWW	D6Z1	AB0057	183		S213	D6Z1	AB0057	309
WIBR2	D6Z1	AB005791	0		Celera	D6Z1	AB0057	0		BCM-HWW	D6Z1	AB0057	0		S213	D6Z1	AB0057	0
WIBR2	D6Z1	AB005791	6		Celera	D6Z1	AB0057	3		BCM-HWW	D6Z1	AB0057	1		S213	D6Z1	AB0057	1
WIBR2	D7Z1a	M16087	1020		Celera	D7Z1a	M16087	2557		BCM-HWW	D7Z1a	M16087	454		S213	D7Z1a	M16087	870
WIBR2	D7Z1b	M16101	929		Celera	D7Z1b	M16101	2272		BCM-HWW	D7Z1b	M16101	490		S213	D7Z1b	M16101	746
WIBR2	D7Z1b	M16101	755		Celera	D7Z1b	M16101	1949		BCM-HWW	D7Z1b	M16101	357		S213	D7Z1b	M16101	579
WIBR2	D7Z2	M16037	13		Celera	D7Z2	M16037	67		BCM-HWW	D7Z2	M16037	11		S213	D7Z2	M16037	61
WIBR2	D7Z2	M16037	11		Celera	D7Z2	M16037	23		BCM-HWW	D7Z2	M16037	12		S213	D7Z2	M16037	32
WIBR2	D7Z2	M16037	10		Celera	D7Z2	M16037	34		BCM-HWW	D7Z2	M16037	14		S213	D7Z2	M16037	40
WIBR2	D7Z2	M16037	5		Celera	D7Z2	M16037	37		BCM-HWW	D7Z2	M16037	11		S213	D7Z2	M16037	36
WIBR2	D7Z2	M16037	0		Celera	D7Z2	M16037	0		BCM-HWW	D7Z2	M16037	0		S213	D7Z2	M16037	1
WIBR2	D7Z2	M16037	1		Celera	D7Z2	M16037	0		BCM-HWW	D7Z2	M16037	0		S213	D7Z2	M16037	0
WIBR2	D7Z2	M16037	16		Celera	D7Z2	M16037	60		BCM-HWW	D7Z2	M16037	15		S213	D7Z2	M16037	54
WIBR2	D7Z2	M16037	2		Celera	D7Z2	M16037	11		BCM-HWW	D7Z2	M16037	3		S213	D7Z2	M16037	14
WIBR2	D7Z2	M16037	1		Celera	D7Z2	M16037	13		BCM-HWW	D7Z2	M16037	0		S213	D7Z2	M16037	3
WIBR2	D7Z2	M16037	11		Celera	D7Z2	M16037	68		BCM-HWW	D7Z2	M16037	10		S213	D7Z2	M16037	46
WIBR2	D7Z2	M16037	10		Celera	D7Z2	M16037	82		BCM-HWW	D7Z2	M16037	9		S213	D7Z2	M16037	66
WIBR2	D7Z2	M16037	14		Celera	D7Z2	M16037	80		BCM-HWW	D7Z2	M16037	9		S213	D7Z2	M16037	60
WIBR2	D7Z2	M16037	23		Celera	D7Z2	M16037	68		BCM-HWW	D7Z2	M16037	5		S213	D7Z2	M16037	36
WIBR2	D7Z2	M16037	1		Celera	D7Z2	M16037	2		BCM-HWW	D7Z2	M16037	0		S213	D7Z2	M16037	0
WIBR2	D7Z2	M16037	19		Celera	D7Z2	M16037	75		BCM-HWW	D7Z2	M16037	6		S213	D7Z2	M16037	44
WIBR2	D8Z2	M64779	279		Celera	D8Z2	M64779	803		BCM-HWW	D8Z2	M64779	248		S213	D8Z2	M64779	472
WIBR2	D8Z2	M64779	223		Celera	D8Z2	M64779	667		BCM-HWW	D8Z2	M64779	174		S213	D8Z2	M64779	360
WIBR2	D8Z2	M64779	449		Celera	D8Z2	M64779	1323		BCM-HWW	D8Z2	M64779	396		S213	D8Z2	M64779	834
WIBR2	D8Z2	M64779	505		Celera	D8Z2	M64779	1386		BCM-HWW	D8Z2	M64779	393		S213	D8Z2	M64779	808
WIBR2	D8Z2	M64779	225		Celera	D8Z2	M64779	712		BCM-HWW	D8Z2	M64779	212		S213	D8Z2	M64779	423
WIBR2	D8Z2	M64779	178		Celera	D8Z2	M64779	493		BCM-HWW	D8Z2	M64779	109		S213	D8Z2	M64779	300
WIBR2	D8Z2	M64779	204		Celera	D8Z2	M64779	587		BCM-HWW	D8Z2	M64779	188		S213	D8Z2	M64779	437
WIBR2	D8Z2	M64779	172		Celera	D8Z2	M64779	475		BCM-HWW	D8Z2	M64779	135		S213	D8Z2	M64779	287
WIBR2	D8Z2	M64779	246		Celera	D8Z2	M64779	751		BCM-HWW	D8Z2	M64779	247		S213	D8Z2	M64779	554
WIBR2	D8Z2	M64779	221		Celera	D8Z2	M64779	735		BCM-HWW	D8Z2	M64779	258		S213	D8Z2	M64779	558
WIBR2	D8Z2	M64779	449		Celera	D8Z2	M64779	1323		BCM-HWW	D8Z2	M64779	396		S213	D8Z2	M64779	834
WIBR2	D8Z2	M64779	441		Celera	D8Z2	M64779	1259		BCM-HWW	D8Z2	M64779	330		S213	D8Z2	M64779	710
WIBR2	D8Z2	M64779	255		Celera	D8Z2	M64779	775		BCM-HWW	D8Z2	M64779	234		S213	D8Z2	M64779	465
WIBR2	D8Z2	M64779	281		Celera	D8Z2	M64779	786		BCM-HWW	D8Z2	M64779	243		S213	D8Z2	M64779	442
WIBR2	D9Z2	M64320	885		Celera	D9Z2	M64320	2665		BCM-HWW	D9Z2	M64320	341		S213	D9Z2	M64320	972
WIBR2	DXZ1	X02418	438		Celera	DXZ1	X02418	1223		BCM-HWW	DXZ1	X02418	337		S213	DXZ1	X02418	472
WIBR2	DXZ1	X02418	348		Celera	DXZ1	X02418	970		BCM-HWW	DXZ1	X02418	252		S213	DXZ1	X02418	377
WIBR2	DXZ1	X02418	238		Celera	DXZ1	X02418	633		BCM-HWW	DXZ1	X02418	160		S213	DXZ1	X02418	250
WIBR2	DXZ1	X02418	296		Celera	DXZ1	X02418	830		BCM-HWW	DXZ1	X02418	228		S213	DXZ1	X02418	335
WIBR2	DXZ1	X02418	406		Celera	DXZ1	X02418	1250		BCM-HWW	DXZ1	X02418	328		S213	DXZ1	X02418	456
WIBR2	DXZ1	X02418	199		Celera	DXZ1	X02418	591		BCM-HWW	DXZ1	X02418	187		S213	DXZ1	X02418	230
WIBR2	DXZ1	X02418	409		Celera	DXZ1	X02418	1203		BCM-HWW	DXZ1	X02418	338		S213	DXZ1	X02418	424
WIBR2	DXZ1	X02418	368		Celera	DXZ1	X02418	1009		BCM-HWW	DXZ1	X02418	270		S213	DXZ1	X02418	405
WIBR2	DXZ1	X02418	96		Celera	DXZ1	X02418	266		BCM-HWW	DXZ1	X02418	63		S213	DXZ1	X02418	98
WIBR2	DXZ1	X02418	215		Celera	DXZ1	X02418	646		BCM-HWW	DXZ1	X02418	225		S213	DXZ1	X02418	294
WIBR2	DYZ3*	M29724	0		Celera	DYZ3	M29724	0		BCM-HWW	DYZ3	M29724	4		S213	DYZ3	M29724	18
WIBR2	DYZ3	M29724	0		Celera	DYZ3	M29724	0		BCM-HWW	DYZ3	M29724	4		S213	DYZ3	M29724	16
WIBR2	DYZ3	M29724	0		Celera	DYZ3	M29724	0		BCM-HWW	DYZ3	M29724	5		S213	DYZ3	M29724	15
WIBR2	DYZ3	M29724	0		Celera	DYZ3	M29724	0		BCM-HWW	DYZ3	M29724	4		S213	DYZ3	M29724	21
WIBR2	DYZ3	M29724	0		Celera	DYZ3	M29724	0		BCM-HWW	DYZ3	M29724	0		S213	DYZ3	M29724	0
WIBR2	DYZ3	M29724	0		Celera	DYZ3	M29724	0		BCM-HWW	DYZ3	M29724	2		S213	DYZ3	M29724	26
WIBR2	DYZ3	M29724	0		Celera	DYZ3	M29724	0		BCM-HWW	DYZ3	M29724	1		S213	DYZ3	M29724	17
WIBR2	DYZ3	M29724	0		Celera	DYZ3	M29724	0		BCM-HWW	DYZ3	M29724	2		S213	DYZ3	M29724	17
WIBR2	DYZ3	M29724	0		Celera	DYZ3	M29724	0		BCM-HWW	DYZ3	M29724	5		S213	DYZ3	M29724	11
WIBR2	DYZ3	M29724	0		Celera	DYZ3	M29724	0		BCM-HWW	DYZ3	M29724	4		S213	DYZ3	M29724	13
WIBR2	DYZ3	M29724	0		Celera	DYZ3	M29724	0		BCM-HWW	DYZ3	M29724	7		S213	DYZ3	M29724	9
WIBR2 fosmid library is derived from a female donor lymphoblastoid cell line (NA15510; 40 kb insert Eco72I partial digest) ,DYZ3 alpha satellite not expected (IHGSC, 2004; Tuzun et al., 2005)
Celera WGS plasmid sequence library corresponds to 8 million reads from EBV-transformed cell lines from 3 females and 1 male (HuAA.ref, HuCC.ref, HuDD.ref, HuFF.ref), one Caucasian, one African-American, one Hispanic-Mexican and one Asian Chinese (plasmid libraries, insert size ranging from 2- 50 kbp) (Venter et al., 2001)
S213 and BCM-HWW were constructed from genomic DNA provided by eight unrelated African Americans (4 males and 4 females) (plasmid libraries, insert sizes 2-6 kb). (IHSC, 2005)
