# Supplementary material for: Organization and Evolution of Primate Centromeric DNA from Whole-Genome Shotgun Sequence Data
Source: PLoS Comput Biol. 2007 Sep 28;3(9):e181. doi: 10.1371/journal.pcbi.0030181 (PMC1994983; doi:10.1371/journal.pcbi.0030181)
Supplement: Table S2 — (15 KB XLS) [file pcbi.0030181.st002.xls]

## Sheet: Sheet1
Table S2: Initially unrecognized and/or partially reconstructed human alpha-satellite higher-order repeats.
	Observed
NEWHOR #	k	Length	assembly length (from phred)	HD	Paired-end Matches		HORArray	Genbank	matchLength (BLAST)	Identity
NEWHOR 5	8	1351	3543bp	4	64/346	0.184971	D18Z	X03693	0.97741	0.97
NEWHOR 6	5	850	8333bp	4	0.261954	0.261954	alphoid	M28031.1	2512bp/2548bp	0.98
NEWHOR 7	8	1364	2899bp	4	0.0150376	0.0150376	D14Z	M22278.1	171bp/171bp	1
Human higher-order alpha satellite repeat structures not initially identified by literature searches but subsequently recovered by comparison of assembled higher-order sequence (Phrap) against Genbank by BLAST
