# Supplementary material for: Organization and Evolution of Primate Centromeric DNA from Whole-Genome Shotgun Sequence Data
Source: PLoS Comput Biol. 2007 Sep 28;3(9):e181. doi: 10.1371/journal.pcbi.0030181 (PMC1994983; doi:10.1371/journal.pcbi.0030181)
Supplement: Table S3 — (13 KB XLS) [file pcbi.0030181.st003.xls]

## Sheet: Sheet1
Table S3: Human vs. chimpanzee sequence divergence of HOR repeats.
Human HOR	Chimp HOR	Identity	matched/total length
D3Z1	chimpHOR 1	0.8	1625/2019
D10Z1b	chimpHOR 3	0.85	875/1027
D12Z3	chimpHOR 4	0.85	1168/1374
D7Z2	chimpHOR 5	0.7745	663/856
D15Z12 (divHOR)	chimpHOR 5	0.81	678/835
D17Z1	chimpHOR 6	0.8884	1059/1192
D21Z1	chimpHOR 7	0.82	982/1196
D10Z1	chimpHOR 8	0.87	592/674
*Sequence identity between human and chimpanzee higher-order alpha-satellite based on optimal global alignment of the best match (BLAST).
