# Supplementary material for: Organization and Evolution of Primate Centromeric DNA from Whole-Genome Shotgun Sequence Data
Source: PLoS Comput Biol. 2007 Sep 28;3(9):e181. doi: 10.1371/journal.pcbi.0030181 (PMC1994983; doi:10.1371/journal.pcbi.0030181)
Supplement: Table S4 — (13 KB XLS) [file pcbi.0030181.st004.xls]

## Sheet: Sheet1
Table S4: Coefficient of determination (R2) values for the expected and actual number of HOR representations.
Library	R2 (minimum size)	R2 (maximum size)
WIBR2	0.1336	0.0912
Celera	0.0447	0.0533
BCM-HWW	0.067	0.021
S213	0.0577	0.0152
